# Supplementary material for: Hybrid lithium-ion capacitors with asymmetric graphene electrodes
Source: Royal Society of Chemistry journal article supplement (doi:10.1039/c7ta01113j), 2017-01-01
Supplement: c7ta01113j1.pdf [file c7ta01113j1.pdf]

## Supplementary Information

### Hybrid Lithium-Ion Capacitors with Asymmetric Graphene Electrodes

Yige Sun,<sup>1,2</sup> Jie Tang,<sup>1,2,\*</sup> Faxiang Qin,<sup>3</sup> Jinshi Yuan,<sup>1</sup> Kun Zhang,<sup>1</sup> Jing Li,<sup>1,2</sup> Da-Ming Zhu,<sup>4</sup> Lu-Chang Qin<sup>5</sup>

<sup>1</sup>*National Institute for Materials Science, 1-2-1 Sengen, Tsukuba 305-0047, Japan. \*E-mail: [tang.jie@nims.go.jp](mailto:tang.jie@nims.go.jp)*

<sup>2</sup>*Doctoral Program in Materials Science and Engineering, University of Tsukuba, 1-1-1 Tennodai, Tsukuba 305-8577, Japan. \*E-mail: [tang.jie@nims.go.jp](mailto:tang.jie@nims.go.jp)*

<sup>3</sup>*Institute for Composite Science Innovation (InCSI), School of Materials Science and Engineering, Zhejiang University, 866 Yuhangtang Road, Hangzhou, Zhejiang, 310058, P. R. China*

<sup>4</sup>*Department of Physics and Astronomy, University of Missouri-Kansas City, Kansas City, Missouri 64110, USA*

<sup>5</sup>*Department of Physics and Astronomy, University of North Carolina at Chapel Hill, Chapel Hill, NC 27599-3255, USA*

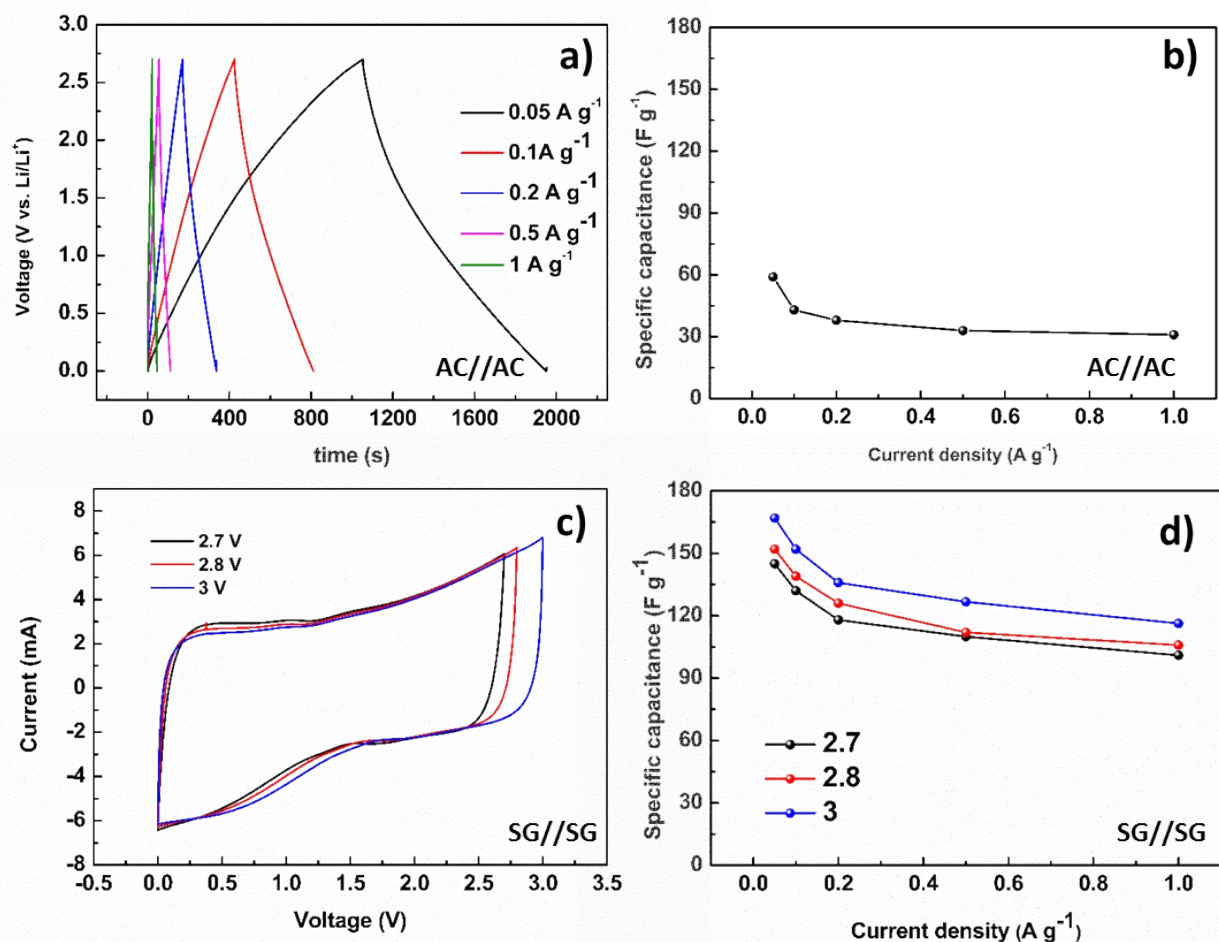

Figure S1 Electrochemical performance of AC in AC//AC device: a) Galvanostatic charge-discharge curves at various current densities, b) Rate performance. Electrochemical performance of SG in SG//SG device under various voltage: 2.7 V, 2.8 V and 3 V: c) Cyclic voltammetry at the scan rate of 200 mV s<sup>-1</sup>, d) Rate performance.

Figure S1 compared the electrochemical performance of AC and SG in an EDLC device (AC//AC and SG//SG respectively). The specific capacitance of SG was up to 145 F g<sup>-1</sup> under a current density of 50 mA g<sup>-1</sup>. It was slowly reduced to 101 F g<sup>-1</sup> when the current density was increased to 1 A g<sup>-1</sup>. This value is much larger than that of the symmetric capacitor device AC//AC, as shown in Figure S1a and 1b. The specific capacitance of AC was only 60 F g<sup>-1</sup>, and quickly dropped to 31 F g<sup>-1</sup>, keeping only 53% of its initial capacitance compared to 70% for SG. When the voltage window increased slightly to 2.8 V and 3 V, the SG//SG kept its EDLC performance as shown in Figure S1c and 1d.

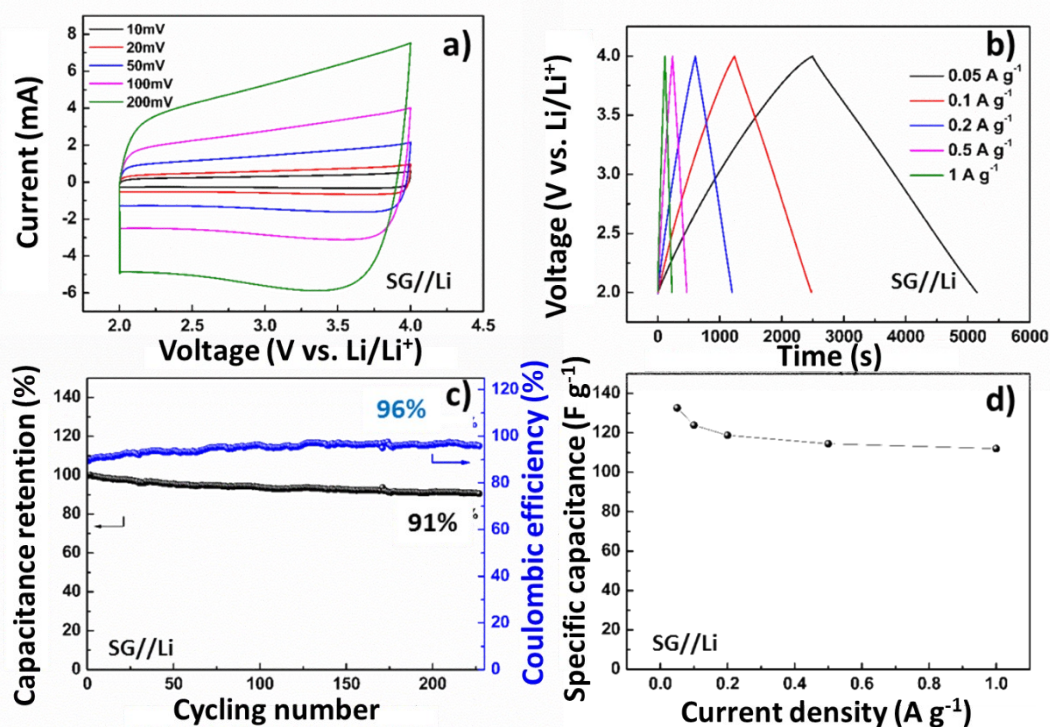

Figure S2 a) Cyclic voltammograms in different scan rates, b) Galvanostatic charge-discharge curves at various current densities, c) cycling performances and d) rate performance measured in a SG//Li device.

As shown in Figure S2a, the voltammetry characteristics curves of the SG//Li device exhibit near rectangular shapes under increasing scan rates. This result, indicative of the excellent non-faradaic behavior of SG, can be confirmed by the nearly straight galvanostatic charge-discharge curves under increasing current densities in Figure S2b. The anions were adsorbed and desorbed quickly within the potential range from 2 V to 4V vs. Li/Li<sup>+</sup>. The cycling performance of the SG//Li device is shown in Figure S2c. The capacitance retention and coulombic efficiency were 91% and 96% after 250 cycles, respectively. As shown in Figure S2d, the SG exhibited excellent rate performance in the SG//Li device.

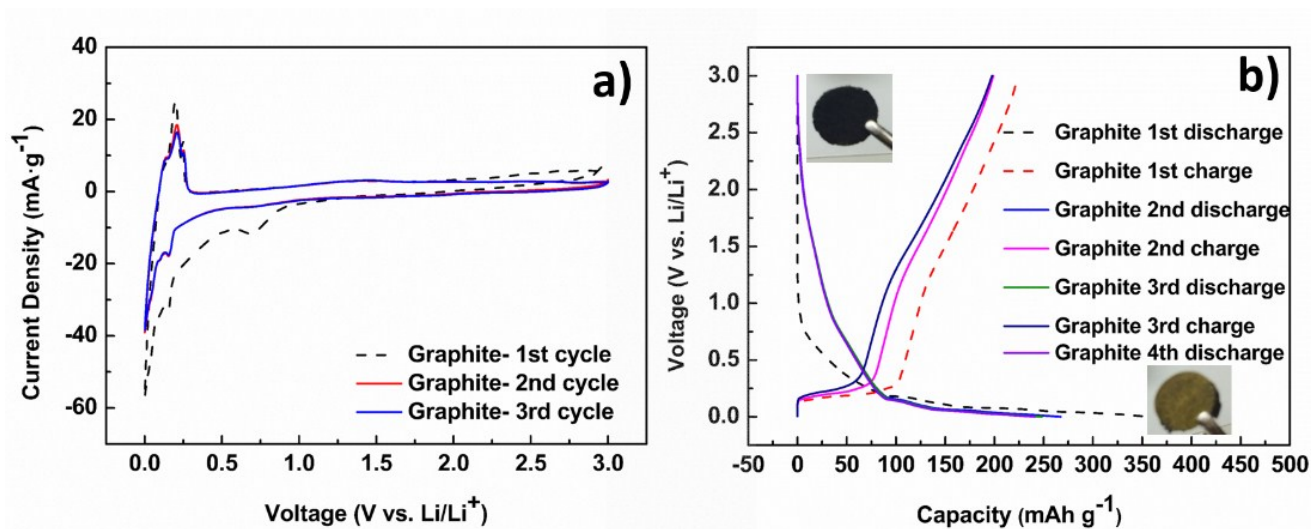

Figure S3 Electrochemical performance of Graphite anode: a) Cyclic voltammograms at a potential scan rate of  $0.1 \text{ mV s}^{-1}$ , b) Galvanostatic charge-discharge curves at  $50 \text{ mA g}^{-1}$ , inset are the photos of graphite electrode before and after lithium- intercalation.

After pre-lithiation, the color of reference graphite anode (Figure S3) change from black to golden, indicating a high pre-lithiation degree through this method. Compared with graphite, which has been commonly used as the anode material in LIB and LIC, the cyclic voltammogram (CV) curve of Li-SG (Figure 3a) exhibits a typical feature of nano-size carbonaceous materials.
